# Supplementary material for: The pig transport network in Switzerland: Structure, patterns, and implications for the transmission of infectious diseases between animal holdings
Source: PubMed Central journal article supplement (PMC6544307; doi:10.1371/journal.pone.0217974), 2019-05-31
Supplement: pone.0217974.s002.pdf [file pone.0217974.s002.pdf]

| Abbr. | Canton                   | Pigs received from other cantons | Pigs sent to other cantons | Pigs traded within canton |
|-------|--------------------------|----------------------------------|----------------------------|---------------------------|
| AG    | Aargau                   | 73,740                           | 85,852                     | 42,458                    |
| AI    | Appenzell Innerrhoden    | 14,281                           | 31,409                     | 9,220                     |
| AR    | Appenzell Ausserrhoden   | 13,005                           | 19,022                     | 5,283                     |
| BE    | Bern                     | 62,133                           | 152,337                    | 204,782                   |
| BL    | Basel-Landschaft         | 13,137                           | 9,961                      | 447                       |
| BS    | Basel-Stadt              | 140                              | -                          | -                         |
| FL    | Fürstentum Liechtenstein | 1,976                            | 431                        | -                         |
| FR    | Fribourg                 | 107,592                          | 24,422                     | 32,899                    |
| GE    | Geneva                   | 4,011                            | 70                         | 23                        |
| GL    | Glarus                   | 5,064                            | 58                         | 221                       |
| GR    | Grisons                  | 8,334                            | 998                        | 3,083                     |
| JU    | Jura                     | 14,657                           | 8,521                      | 8,182                     |
| LU    | Luzern                   | 119,837                          | 272,822                    | 459,498                   |
| NE    | Neuchâtel                | 17,785                           | 5,407                      | 2,070                     |
| NW    | Nidwalden                | 16,529                           | 4,291                      | 2,637                     |
| OW    | Obwalden                 | 15,747                           | 5,852                      | 1,203                     |
| SG    | St. Gallen               | 131,776                          | 82,714                     | 96,614                    |
| SH    | Schaffhausen             | 20,249                           | 20,343                     | 3,488                     |
| SO    | Solothurn                | 27,999                           | 25,931                     | 7,074                     |
| SZ    | Schwyz                   | 39,247                           | 21,034                     | 3,090                     |
| TG    | Thurgau                  | 96,863                           | 61,049                     | 120,184                   |
| TI    | Ticino                   | 135                              | 8,259                      | 239                       |
| UR    | Uri                      | 8,810                            | 686                        | 184                       |
| VD    | Vaud                     | 39,755                           | 10,898                     | 27,352                    |
| VS    | Valais                   | 1,868                            | 43                         | 39                        |
| ZG    | Zug                      | 13,340                           | 18,292                     | 8,561                     |
| ZH    | Zürich                   | 50,031                           | 47,339                     | 5,768                     |
