# Supplementary material for: The pig transport network in Switzerland: Structure, patterns, and implications for the transmission of infectious diseases between animal holdings
Source: PubMed Central journal article supplement (PMC6544307; doi:10.1371/journal.pone.0217974), 2019-05-31
Supplement: pone.0217974.s003.pdf [file pone.0217974.s003.pdf]

| Source | Target | No. of animals | Source | Target | No. of animals |
|--------|--------|----------------|--------|--------|----------------|
| AG     | FR     | 9,209          | SG     | AI     | 6,108          |
| AG     | LU     | 38,352         | SG     | AR     | 7,152          |
| AG     | SG     | 11,414         | SG     | TG     | 37,479         |
| AG     | TG     | 6,121          | SG     | ZH     | 10,026         |
| AG     | ZH     | 6,966          | SH     | SG     | 7,541          |
| AI     | SG     | 15,820         | SH     | TG     | 8,347          |
| AI     | TG     | 9,660          | SO     | BE     | 6,841          |
| AR     | BE     | 8,241          | SO     | FR     | 5,222          |
| BE     | FR     | 43,424         | SO     | LU     | 5,901          |
| BE     | JU     | 10,706         | SZ     | SG     | 6,941          |
| BE     | LU     | 37,915         | TG     | AI     | 5,549          |
| BE     | NE     | 5,277          | TG     | SG     | 36,743         |
| BE     | SG     | 6,204          | TI     | SZ     | 7,013          |
| BE     | SO     | 10,001         | VD     | FR     | 7,860          |
| BE     | TG     | 7,011          | ZG     | LU     | 6,887          |
| BE     | VD     | 10,100         | ZH     | AG     | 6,522          |
| FR     | BE     | 7,802          | ZH     | LU     | 8,987          |
| FR     | VD     | 7,700          | ZH     | SG     | 13,668         |
| LU     | AG     | 45,403         | ZH     | TG     | 6,064          |
| LU     | BE     | 31,553         |        |        |                |
| LU     | BL     | 8,445          |        |        |                |
| LU     | FR     | 33,733         |        |        |                |
| LU     | NW     | 11,084         |        |        |                |
| LU     | OW     | 10,547         |        |        |                |
| LU     | SG     | 22,401         |        |        |                |
| LU     | SO     | 11,814         |        |        |                |
| LU     | SZ     | 19,605         |        |        |                |
| LU     | TG     | 14,940         |        |        |                |
| LU     | UR     | 5,603          |        |        |                |
| LU     | VD     | 13,258         |        |        |                |
| LU     | ZG     | 8,687          |        |        |                |
| LU     | ZH     | 18,610         |        |        |                |
